# Supplementary material
Source: PubMed Central journal article supplement (PMC7958442)
Supplement: pnas.2020922118.sapp.pdf [file pnas.2020922118.sapp.pdf]

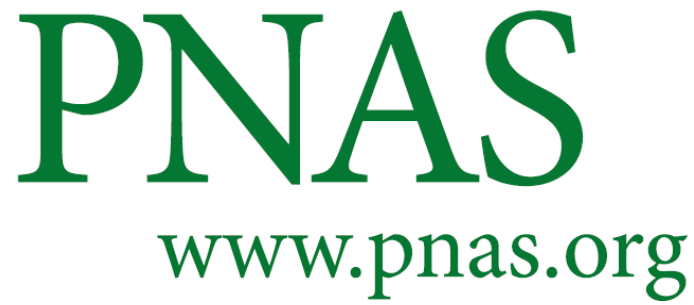

**Supplementary Information for**

Dual oxidase enables insect gut symbiosis by mediating respiratory network formation

Seonghan Jang, Peter Mergaert, Tsubasa Ohbayashi, Kota Ishigami, Shuji Shigenobu, Hideomi Itoh and Yoshitomo Kikuchi

**\*Correspondence**

**Email:** [y-kikuchi@aist.go.jp](mailto:y-kikuchi@aist.go.jp) or [peter.mergaert@i2bc.paris-saclay.fr](mailto:peter.mergaert@i2bc.paris-saclay.fr)

**This PDF file includes:**

Supplementary text  
Figures S1 to S7  
Tables S1 to S2  
SI References

## **Supplementary text**

### **Supporting Materials and Methods**

#### **Measurement of the insect survival rate**

To estimate the pathogenicity of entomopathogenic bacterium *S. marcescens*, third instar nymphs of Sym and *RpDuox*-RNAi bean bugs were orally infected with  $10^7$  cells/ml of *S. marcescens* and the number of dead insects was counted every day. The number of carcasses of *RpBnl*-, *RpTrh*-, *RpSima*-, and *RpDuox*-RNAi insects was counted every day to measure the mortality of insects upon the silencing of these genes. For each experiment, 20 insects were used.

#### **RNA-sequencing analysis**

Total RNA was extracted from the dissected symbiotic organ of Sym and *RpDuox*-RNAi insects using the RNAiso Plus and RNeasy Mini Kits. The cDNA libraries were prepared by TruSeq RNA Sample Preparation Kit v2 (Illumina) and sequenced by Illumina HiSeq-2000 (Illumina). The adapter sequences of raw reads (Accession number DRR215696-DRR215701) were trimmed by Trimmomatic (1) and the reference contigs were constructed by *de novo* assembly using Trinity (2). To identify the genes used in this study, assembled sequences were compared with the protein database of *Drosophila* by blastx. Transcripts of each sample were quantified by RSEM with Bowtie2 Aligner and differential expression of genes between Sym and *RpDuox*-RNAi insects was determined with DESeq2 (3). To visualize relatively up- or down-regulated genes, heatmap presentations were produced with the gplots package in program R ver. 3.6.2.

#### **Protein domain and phylogenetic analysis**

The transmembrane and functional domains of *RpDuox* were predicted by Phobius and

InterPro. The amino acid sequences of Duox proteins of selected organisms were retrieved from DDBJ/ENA/GenBank database and aligned using the MAFFT version 7 (4). Phylogenies were inferred based on the maximum likelihood methods with the Jones-Taylor-Thornton model (5) and 1,000 bootstrap replications, using the MEGA version 7.0.26 (6).

### **Statistical analyses**

All statistical analyses were performed using the program R ver. 3.6.2 and GraphPad Prism ver. 8.3.1.

### **Data availability**

RNA-seq data of the M4 of Sym<sup>control</sup> and Sym<sup>RpDuox-RNAi</sup> are available under National Center for Biotechnology Information (NCBI) BioProject PRJDB9456 with DRA accession numbers DRR215696-DRR215701. The gene sequences of *RpDuox*, *RpBnl*, *RpTrh*, *RpSima*, and *RpRelish* are deposited in GenBank with accession number MT270146-MT270150. The sequences of Duox of *Gryllus bimaculatus*, *Bombyx mori*, and *Tribolium castaneum* are deposited in GenBank with accession number MT270151, NW\_004582026, and NC\_007418, respectively.

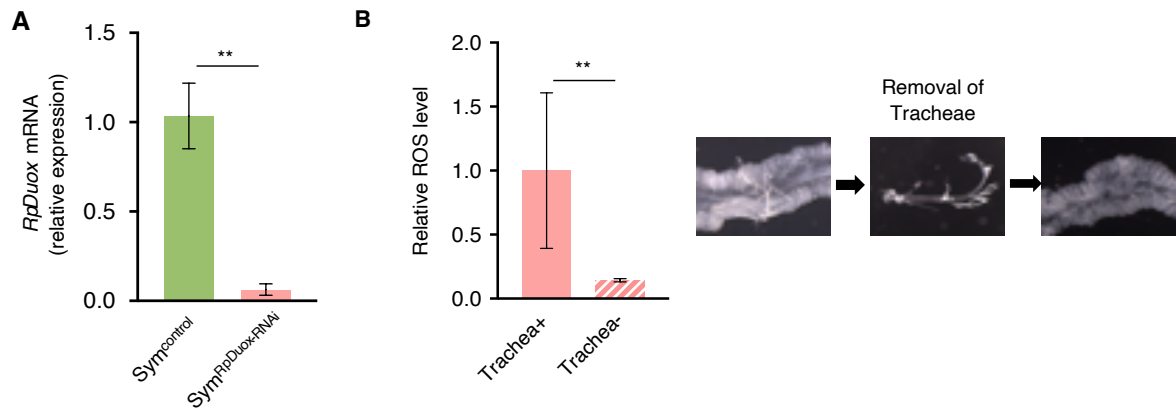

**Fig. S1. Duox-mediated generation of ROS from the tracheal network in *R. pedestris*.** (A) The efficiency of *RpDuox*-RNAi. The expression level of *RpDuox* was quantified by RT-qPCR after the injection of *RpDuox* dsRNA. (B) Relative ROS levels in the M4 of Sym<sup>control</sup> insects before and after removing tracheae (left); photographs showing the removal of the tracheae (right). Data shown in (A and B) are mean  $\pm$  s.d.  $n = 5$  insects. Asterisks indicate statistically significant differences (\*\*,  $P < 0.01$ ). The statistical significance among samples was analyzed by the Mann-Whitney  $U$  test.

Sym<sup>control</sup>

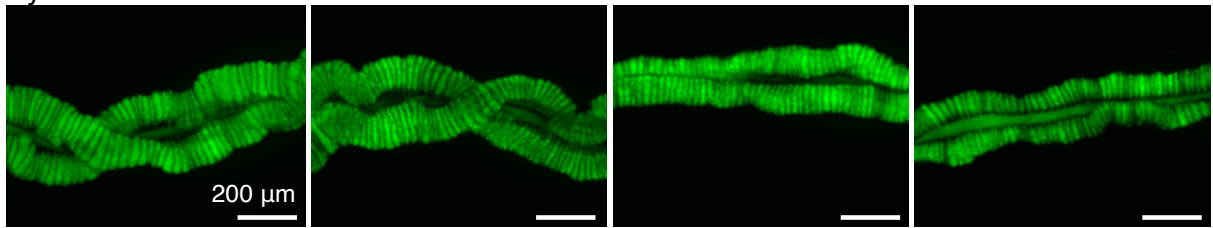

Sym<sup>RpDuoX-RNAi</sup>

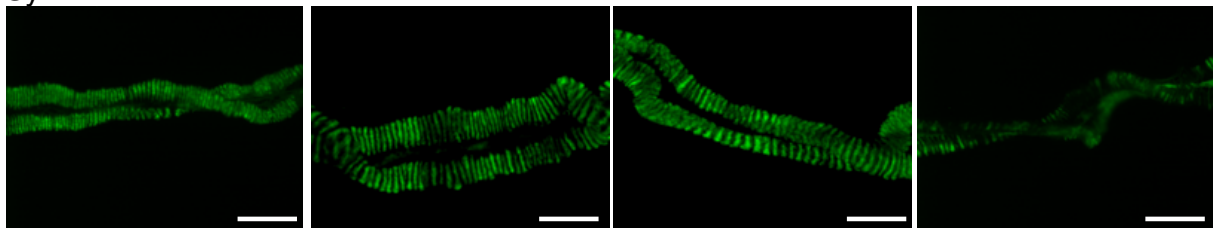

Sym<sup>RpDuoX/RpRelish-RNAi</sup>

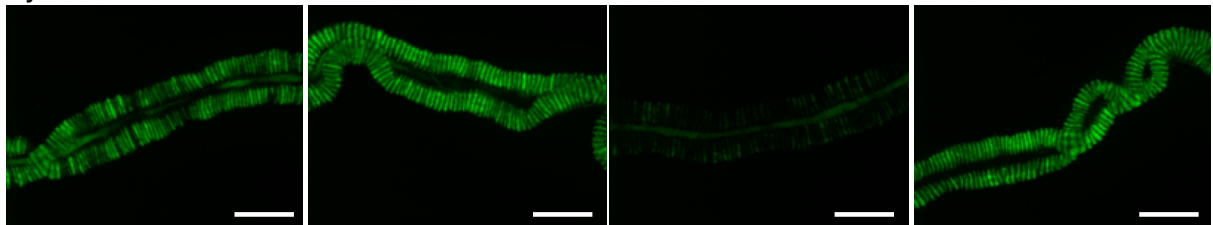

**Fig. S2. Effect of *RpDuoX/RpRelish* double RNAi on gut symbiosis.** Effect of *RpDuoX/RpRelish*-double RNAi on symbiosis. Green color indicates the GFP signal from gut-colonizing *Burkholderia* symbionts.

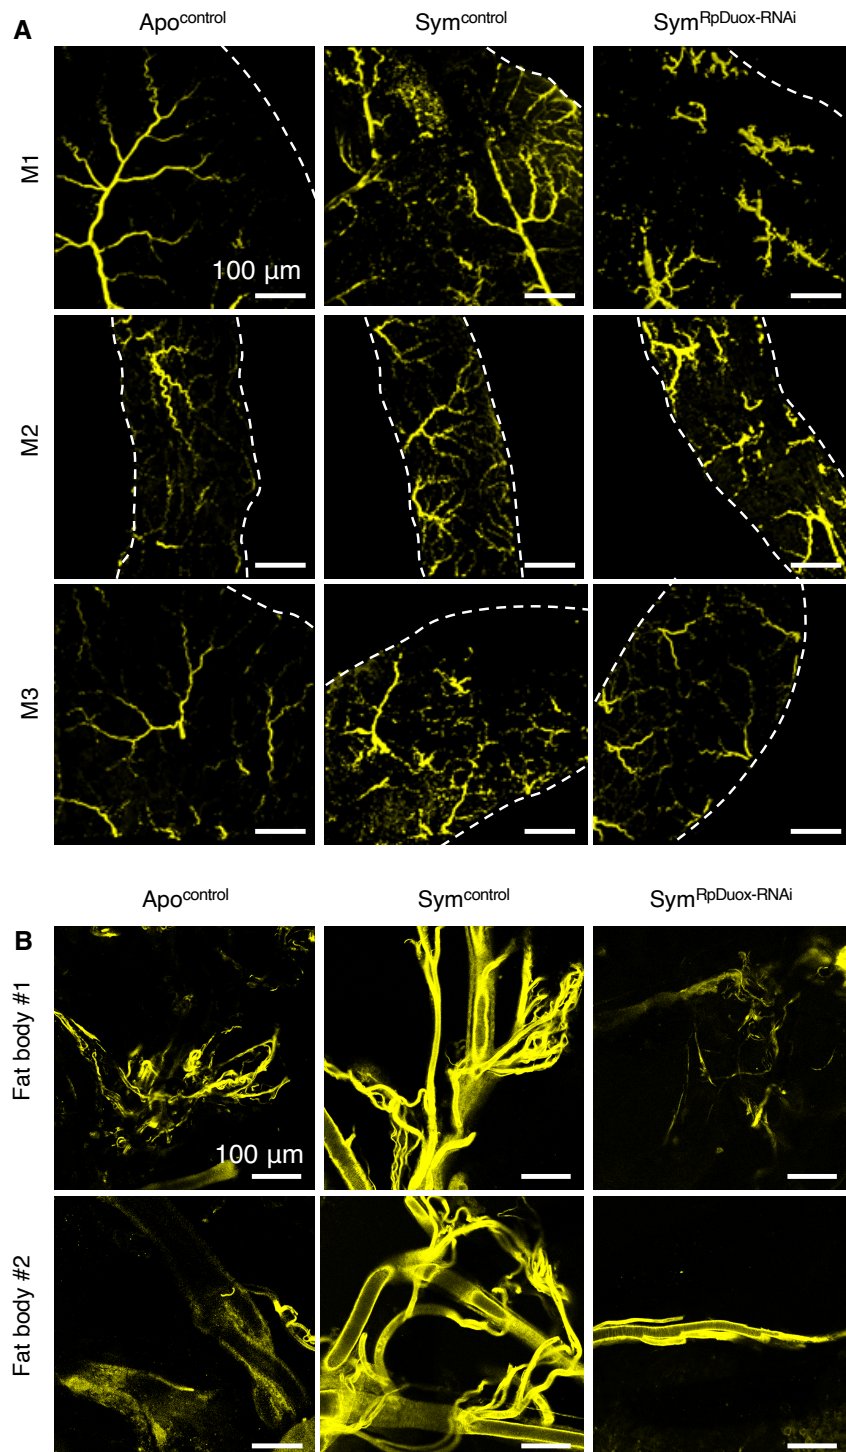

**Fig.S3. Dityrosine network (DTN) in the tracheae of the midgut regions and the fat body. (A)** Dissected M1, M2, M3, and **(B)** fat body of Apo (Apo<sup>control</sup>), Sym (Sym<sup>control</sup>) and *RpDuox*-RNAi (Sym<sup>RpDuox-RNAi</sup>) insects were stained by anti-dityrosine antibody. The tracheoles were much more ramified in Sym insects, compared to Apo or *RpDuox*-RNAi insects. Yellow color indicates the DTN of tracheae.

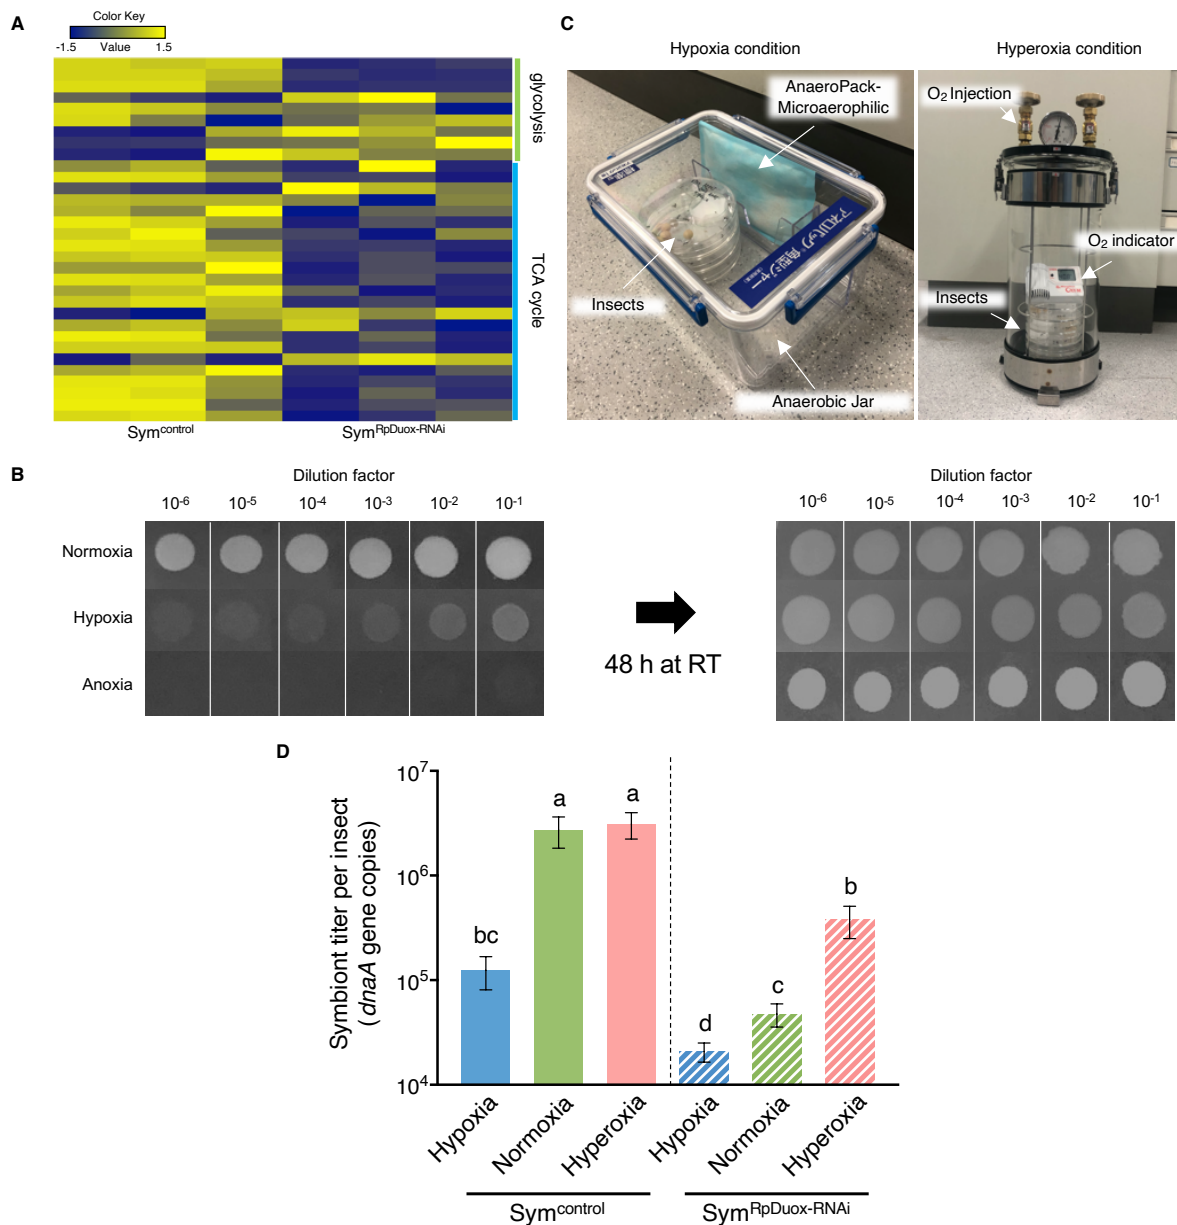

**Fig. S4. Effect of oxygen level on host metabolism and *Burkholderia* symbiont.** (A) The expression level of the genes related to glycolysis and TCA cycle in Sym<sup>control</sup> and Sym<sup>RpDuox-RNAi</sup> insects. Each column is a replicate experiment. (B) Growth of the wild-type *Burkholderia* gut symbiont on agar plate in aerobic (21% O<sub>2</sub>), microaerophilic (6-12% O<sub>2</sub>), and anaerobic (<0.1% O<sub>2</sub>) environment for 48 h (left panel) and growth after transfer of plates to normoxia and further incubation for 48 h (right panel). (C) Images of the hypoxia (6-12% O<sub>2</sub>) and hyperoxia (39-42% O<sub>2</sub>) set ups. (D) The number of gut symbionts in the M4 of Sym<sup>control</sup> and Sym<sup>RpDuox-RNAi</sup> insects reared in hypoxia, normoxia, and hyperoxia condition. Data shown in (D) are mean  $\pm$  s.d.  $n = 10$  insects. Different letters indicate statistically significant differences ( $P < 0.05$ ). The statistical significance of differences between samples was analyzed by a Kruskal-Wallis test with Bonferroni correction.

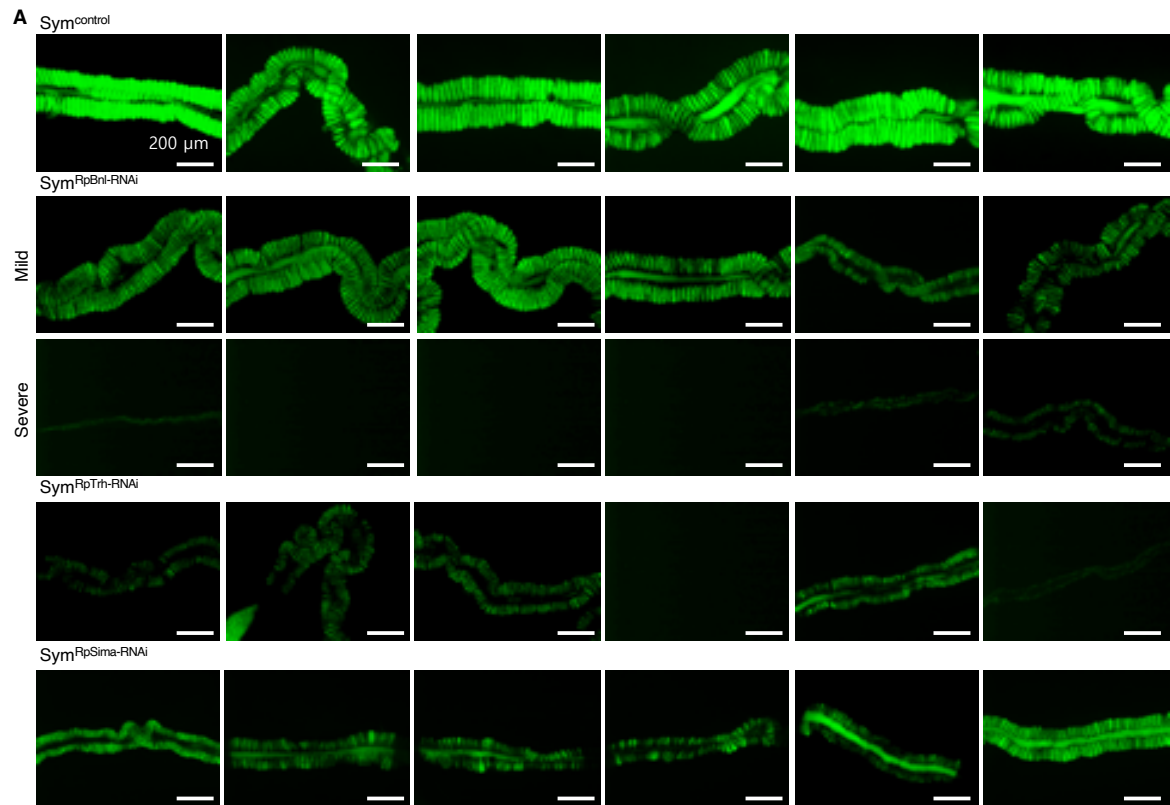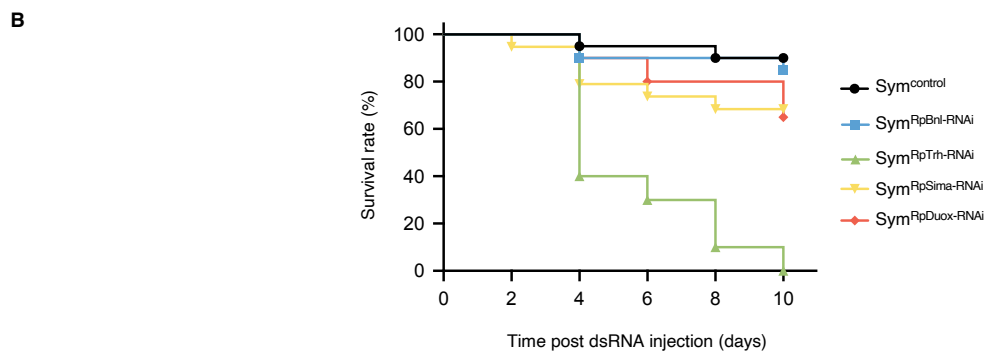

**Fig. S5. Effect of *RpBnl*-, *RpTrh*-, and *RpSima*-RNAi on symbiosis and survival of insects. (A)** Fluorescence microscopy images of the symbiotic organ of  $Sym$  ( $Sym^{control}$ ),  $RpBnl$ -RNAi ( $Sym^{RpBnl-RNAi}$ ),  $RpTrh$ -RNAi ( $Sym^{RpTrh-RNAi}$ ), and  $RpSima$ -RNAi ( $Sym^{RpSima-RNAi}$ ) insects. In  $Sym^{RpBnl-RNAi}$  insects, “Mild” are examples in which symbiosis is moderately affected by RNAi and “Severe” are examples in which symbiosis is seriously affected by RNAi. **(B)** The survival rate of  $Sym^{control}$ ,  $Sym^{RpBnl-RNAi}$ ,  $Sym^{RpTrh-RNAi}$ , and  $Sym^{RpSima-RNAi}$  insects in days after the silencing of the target genes.  $n = 20$  insects.



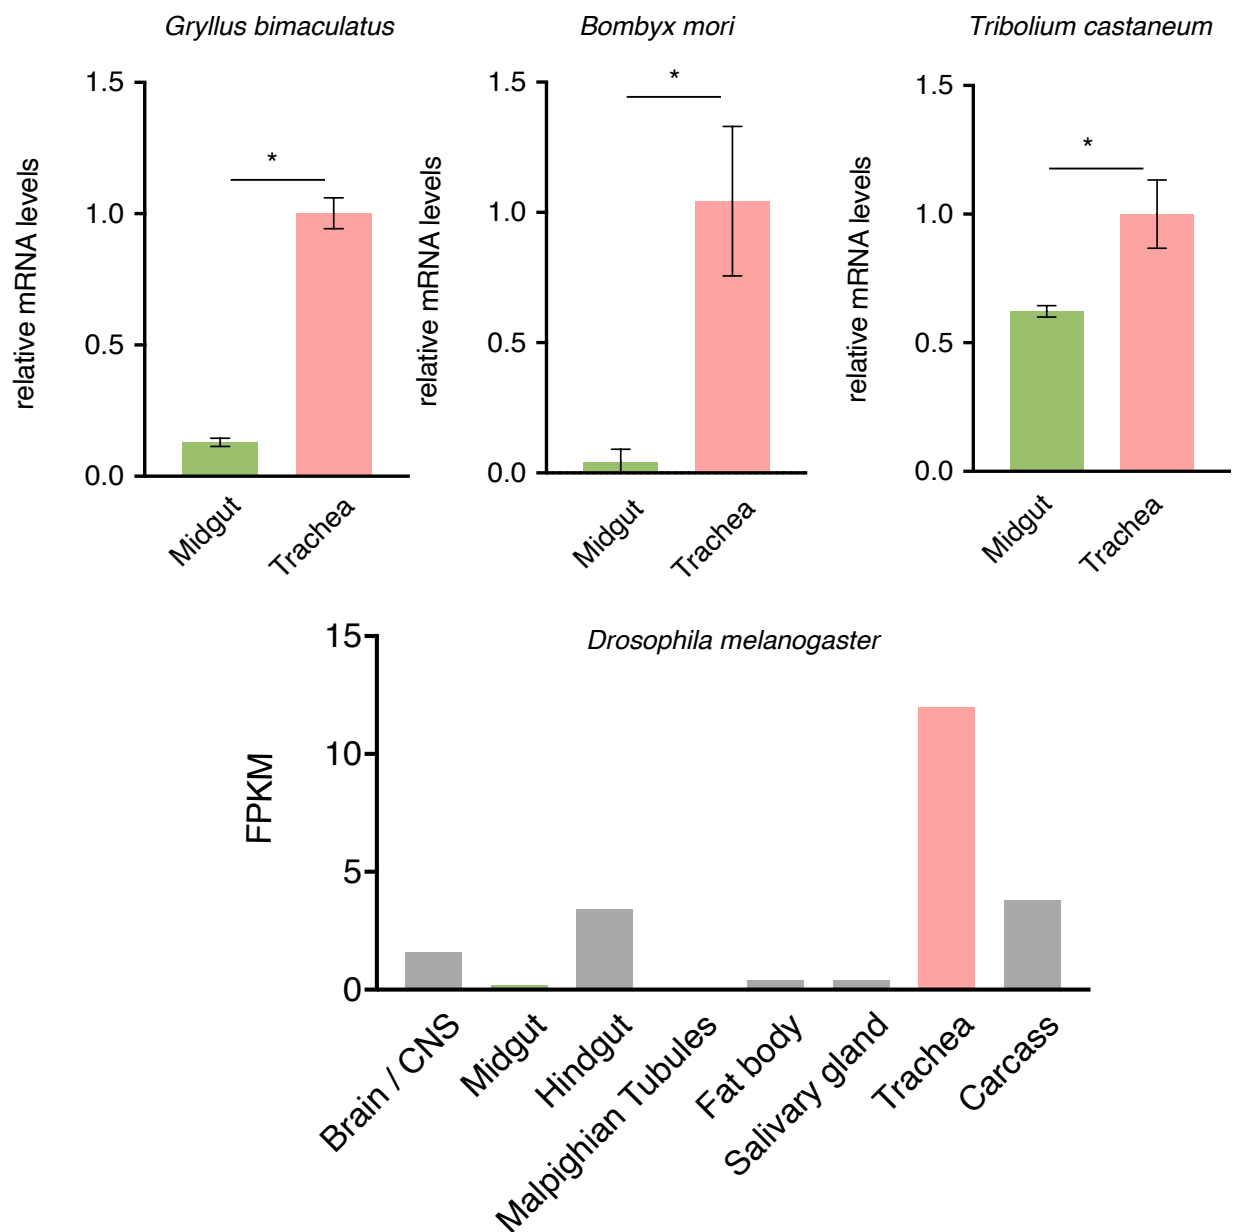

**Fig. S6. The expression level of *Duox* in phylogenetically different orders of insects.** The mRNA levels of *Duox* were measured from extracted midgut and tracheae of nymphal *G. bimaculatus* (Orthoptera), larval *B. mori* (Lepidoptera), and adult *T. castaneum* (Coleoptera), by RT-qPCR (top). Data shown in a,b are mean  $\pm$  s.d.  $n = 4$  insects. The statistical significance among samples was analyzed by the Mann-Whitney  $U$  test. Asterisks indicate statistically significant differences ( $P < 0.05$ ). The FPKM (fragments per kilobase of exon model per million reads mapped) values of the *Duox* gene in larval *D. melanogaster* (Diptera) were extracted from the FlyAtlas 2 database (<http://flyatlas.gla.ac.uk/FlyAtlas2/index.html>) (bottom). CNS, central neural system.

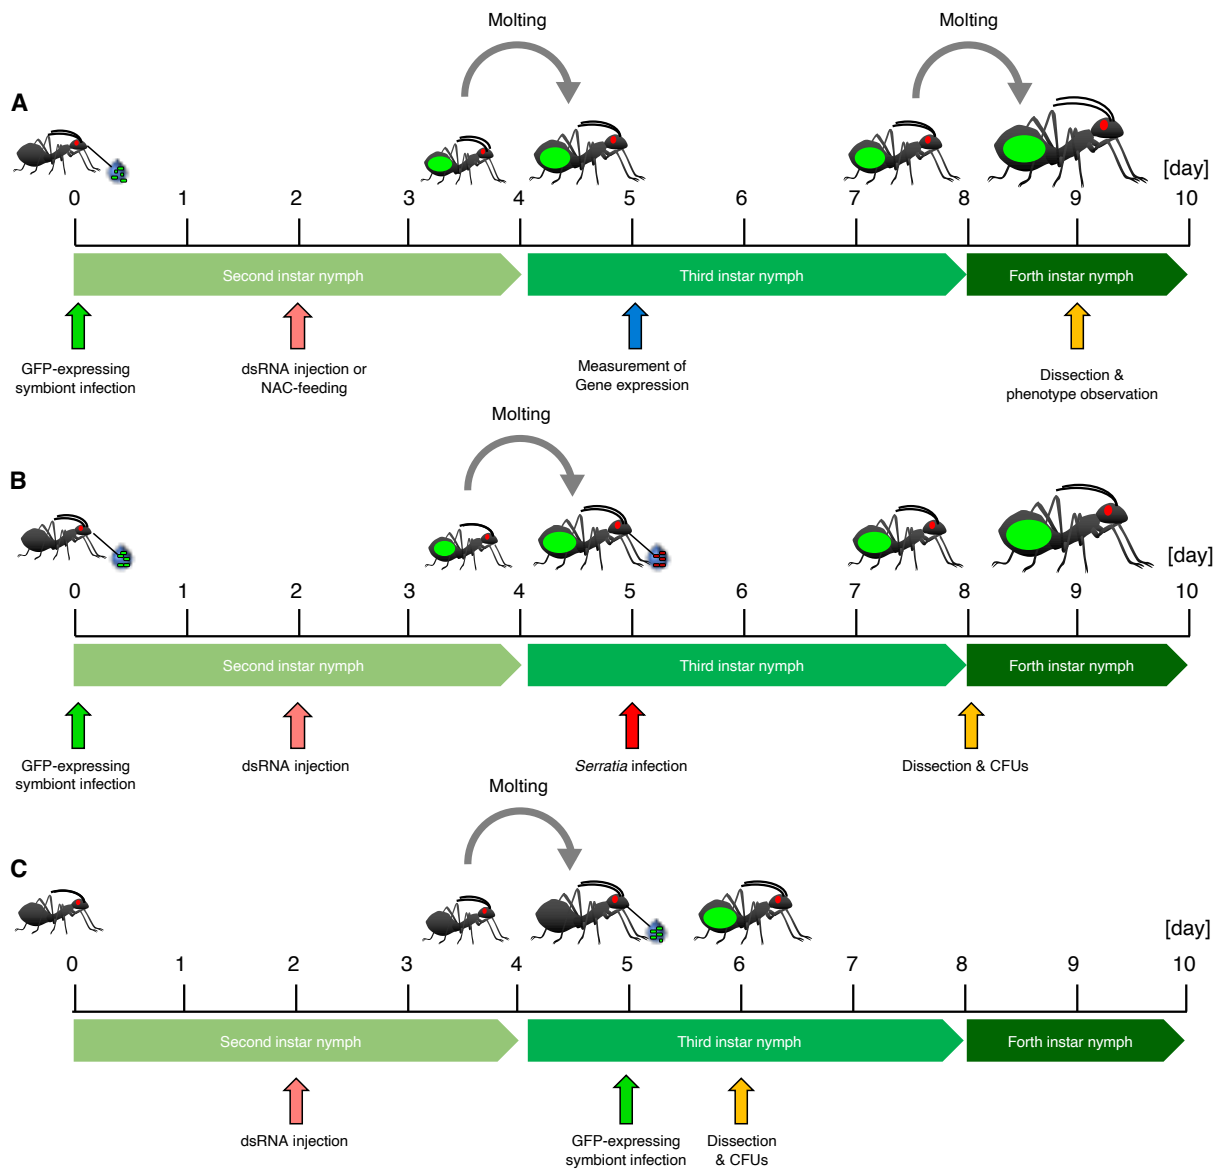

**Fig. S7. The timeline of experiments used in this study. (A)** The timeline of the experiments for measuring gene expression and phenotypic observation. **(B)** The timeline of the experiment for *Serratia* CFU. **(C)** The timeline of the experiment for *Burkholderia* CFU; CFU, colony-forming units.

**Table 1. Bacterial strains**

| Bacteria                                 | Description                                                                                                                                                                                      | Fluorescence     | Reference <sup>c</sup> |
|------------------------------------------|--------------------------------------------------------------------------------------------------------------------------------------------------------------------------------------------------|------------------|------------------------|
| <i>Burkholderia insecticola</i> symbiont |                                                                                                                                                                                                  |                  |                        |
| RPE75                                    | Spontaneous Rfr mutant of wild-type <i>Burkholderia insecticola</i> symbiont RPE64                                                                                                               | -                | (1)                    |
| RPE225                                   | GFP-labeled mutant of <i>Burkholderia</i> symbiont RPE75                                                                                                                                         | GFP <sup>a</sup> | (2)                    |
| <i>resB::pVO-GFP</i>                     | Cytochrome c biogenesis mutant                                                                                                                                                                   | GFP <sup>b</sup> | This study             |
| <i>ΔuppP</i>                             | Cell wall synthesis mutant                                                                                                                                                                       | GFP <sup>a</sup> | (3)                    |
| <i>purL::Tn5</i>                         | Purine biosynthesis mutant                                                                                                                                                                       | GFP <sup>a</sup> | (4)                    |
| <i>fliC::Tn5</i>                         | Flagella mutant                                                                                                                                                                                  | GFP <sup>a</sup> | (5)                    |
| <i>Escherichia coli</i>                  |                                                                                                                                                                                                  |                  |                        |
| DH5α                                     | F- Φ80d <i>lacZ</i> ΔM15 Δ( <i>lacZYA-argF</i> )U169 <i>deoR recA1 endA1</i> <i>hsdR17</i> (r <sub>K</sub> <sup>-</sup> , m <sub>K</sub> <sup>+</sup> ) <i>phoA supE44 λ- thi-1 gyrA96 relA1</i> |                  | Toyobo                 |
| <i>Serratia marcescens</i>               |                                                                                                                                                                                                  |                  |                        |
| Db11                                     | Spontaneous Rfr mutant of <i>S. marcescens</i> Db10                                                                                                                                              |                  | (6)                    |

<sup>a</sup>GFP was labelled by the Tn7 minitransposon system

<sup>b</sup>GFP was labelled by insertion of GFP-expressing plasmid pVO-GFP into *resB* gene

<sup>c</sup>references: **(1)** Kikuchi Y, Meng XY, Fukatsu T. Gut symbiotic bacteria of the genus *Burkholderia* in the broad-headed bugs *Riptortus clavatus* and *Leptocoris chinensis* (Heteroptera: Alydidae). *Appl Environ Microbiol* 2005; 71: 4035-4043; **(2)** Kikuchi Y, Fukatsu T. Live imaging of symbiosis: spatiotemporal infection dynamics of a GFP-labelled *Burkholderia* symbiont in the bean bug *Riptortus pedestris*. *Mol Ecol* 2014; 23: 1445-1456; **(3)** Kim JK, Lee HJ, Kikuchi Y, Kitagawa W, Nikoh N, Fukatsu T et al. Bacterial cell wall synthesis gene *uppP* is required for *Burkholderia* colonization of the stinkbug gut. *Appl Environ Microbiol* 2013; 79(16): 4879-4886; **(4)** Kim JK, Jang HA, Won YJ, Kikuchi Y, Han SH, Kim CH et al. Purine biosynthesis-deficient *Burkholderia* mutants are incapable of symbiotic accommodation in the stinkbug. *ISME J* 2014; 8: 552-63; **(5)** Ohbayashi T, Takeshita K, Kitagawa W, Nikoh N, Koga R, Meng XY et al. Insect's intestinal organ for symbiont sorting. *Proc Natl Acad Sci USA* 2015; 112: E5179-E5188; **(6)** Kurz CL, Chauvet S, Andrès E, Aurouze M, Vallet I, Michel GP et al. Virulence factors of the human opportunistic pathogen *Serratia marcescens* identified by *in vivo* screening. *EMBO J*. 2003 1;22(7):1451-60.

**Table 2. Primers**

| Primers      | Sequence (5'-3')                             | T <sub>m</sub> (°C) | Description                                             | Product size (bp)         |
|--------------|----------------------------------------------|---------------------|---------------------------------------------------------|---------------------------|
| bsDnaA_F     | AGCGCGAGATCAGACGGTCGTC<br>GAT                | 70.7                | Measurement of symbiont <i>dnaA</i> gene copies by qPCR | 150                       |
| bsDnaA_R     | TCCGGCAAGTCGCGCACGCA                         | 66.6                |                                                         |                           |
| T7_pT7bR20   | TAATACGACTCACTATAGGGGAT<br>CTACTAGTCATATGGAT | 74                  | Used for dsRNA synthesis                                | Depend on the insert size |
| T7_pT7bU19_2 | TAATACGACTCACTATAGGGGAC<br>GGCCAGTGAAT       | 74.1                |                                                         |                           |
| Duox_dsF     | TGCCCTGCTGACATTCTCTA                         | 58.4                | Used for dsRNA synthesis targeting <i>RpDuox</i>        | 451                       |
| Duox_dsR     | AGTTGTATCCTCCCGCTCTG                         | 60.5                |                                                         |                           |
| Duox_qF      | CATTGGCGGGATGTTAGAGT                         | 51.8                | Used for qPCR targeting <i>RpDuox</i>                   | 139                       |
| Duox_qR      | TTCTTCGGGTGTGAAAATCC                         | 58.4                |                                                         |                           |
| Bnl_dsF      | TCCCCTCAGCTAGCTCACAT                         | 60.5                | Used for dsRNA synthesis targeting <i>RpBnl</i>         | 490                       |
| Bnl_dsR      | TGGGTCTAGGTGGAGCTGAG                         | 62.5                |                                                         |                           |
| Bnl_qF       | AACAGAAGGATCAGGCACCG                         | 60.5                | Used for qPCR targeting <i>RpBnl</i>                    | 117                       |
| Bnl_qR       | TGTGTCTGGTATGGTCCTCCT                        | 60.5                |                                                         |                           |
| Trh_dsF      | CCATCACCTCCCAACTGGAC                         | 62.5                | Used for dsRNA synthesis targeting <i>RpTrh</i>         | 581                       |
| Trh_dsR      | GAGGGTTGACTTCATCCGCA                         | 60.5                |                                                         |                           |
| Trh_qF       | GACGCACACAGACTGAGGAA                         | 60.5                | Used for qPCR targeting <i>RpTrh</i>                    | 151                       |
| Trh_qR       | GCTCGTCTGCGTTTTTTCGAA                        | 58.4                |                                                         |                           |
| Sima_dsF     | TGTCCACTGGAGCAGTCAAG                         | 60.5                | Used for dsRNA synthesis targeting <i>RpSima</i>        | 516                       |
| Sima_dsR     | GGTTTCTCCCTTTGCTGGAT                         | 58.4                |                                                         |                           |
| Sima_qF      | AGGATCATTCCGGTTTGTG                          | 56.4                | Used for qPCR targeting <i>RpSima</i>                   | 134                       |
| Sima_qR      | CATCCTTTCATCCGCATAGG                         | 58.4                |                                                         |                           |
| Ef1a_F       | CCTGCATCCGTTGCTTTTGT                         | 58.4                | Used for qPCR targeting <i>rEf1a</i>                    | 150                       |
| Ef1a_R       | GGCATCGAGGGCTTCAATAA                         | 58.4                |                                                         |                           |
| Relish_dsF   | GCTGGCACGAAAACCTACCTAA                       | 59.5                | Used for dsRNA synthesis targeting <i>RpRelish</i>      | 525                       |
| Relish_dsR   | TGTACATTCTGAGGGCCAAAG                        | 59.5                |                                                         |                           |
| Relish_qF    | GCCAGATGAATATTGTCAATG                        | 58.4                | Used for qPCR targeting <i>RpRelish</i>                 | 107                       |
| Relish_qR    | TAACAGCCGACTGCGAGAG                          | 59.5                |                                                         |                           |
| Riptocin_F   | TCCGAAGCTGAGGGTCTTCCCG                       | 67.9                | Used for qPCR targeting <i>riptocin</i>                 | 128                       |
| Riptocin_R   | TCCGCATCCAAGTTCGCGTCC                        | 65.3                |                                                         |                           |
| Defensin_F   | TCGGTCGGACTGAGACTGAA                         | 60.5                | Used for qPCR targeting <i>rDefensin</i>                | 108                       |
| Defensin_R   | TTGCCGCCTTTGTATCCCTT                         | 58.4                |                                                         |                           |
| Thanatin_F   | GTCTGCCTTCGTTGAAGACG                         | 60.5                | Used for qPCR targeting <i>rThanatin</i>                | 108                       |

|            |                      |      |                                        |     |
|------------|----------------------|------|----------------------------------------|-----|
| Thanatin_R | ATTCGCTTGCAAACGCCG   | 56.3 |                                        |     |
| BmRp49_F   | CAGGCATCAATCGGATCGCT | 60.5 | Used for qPCR targeting <i>BmRp49</i>  | 150 |
| BmRp49_R   | GGGAGCATATGACGGGTCTT | 60.5 |                                        |     |
| BmDuox_F   | GGTGGGATGCTGGAGTCTAA | 60.5 | Used for qPCR targeting <i>BmDuox</i>  | 103 |
| BmDuox_R   | TTTCGAACCAAATCGATCA  | 52.3 |                                        |     |
| GbEf1a_F   | ATTGATGCCCTGGTCACAG  | 60.5 | Used for qPCR targeting <i>GbEf1a</i>  | 104 |
| GbEf1a_R   | TCAAACCTACCAGTACCCGC | 60.5 |                                        |     |
| GbDuox_F   | CCAAAGATTCGTCTCGAAGG | 58.4 | Used for qPCR targeting <i>GbDuox</i>  | 149 |
| GbDuox_R   | TACCGATTGGTTGAGGTTCC | 58.4 |                                        |     |
| TcRps18_F  | CTGCTGAAGTGAGGTCTGGG | 62.5 | Used for qPCR targeting <i>TcRps18</i> | 141 |
| TcRps18_R  | CGCAATTTGGAGTCAAGCGT | 58.4 |                                        |     |
| TcDuox_F   | GTATTCGCTCACCCGACAAT | 58.4 | Used for qPCR targeting <i>TcDuox</i>  | 147 |
| TcDuox_R   | GCCGATGAAAAATAGCCAAA | 54.3 |                                        |     |

---

## SI references

1. Bolger, A. M., Lohse, M. & Usadel, B. Trimmomatic: A flexible trimmer for Illumina sequence data. *Bioinformatics* **30**, 2114-2120 (2014).
2. Haas, B. J. *et al.* De novo transcript sequence reconstruction from RNA-seq using the Trinity platform for reference generation and analysis. *Nat. Protoc.* **8**, 1494-1512 (2013).
3. Love, M. I., Huber, W. & Anders, S. Moderated estimation of fold change and dispersion for RNA-seq data with DESeq2. *Genome Biol.* **15**, 550 (2014).
4. Katoh, K. & Standley, D. M. MAFFT multiple sequence alignment software version 7: Improvements in performance and usability. *Mol. Biol. Evol.* **30**, 772-780 (2013).
5. Jones, D. T., Taylor, W. R. & Thornton, J. M. The rapid generation of mutation data matrices from protein sequences. *Bioinformatics* **8**, 275-282 (1992).
6. Kumar, S., Stecher, G. & Tamura, K. MEGA7: Molecular Evolutionary Genetics Analysis Version 7.0 for Bigger Datasets. *Mol. Biol. Evol.* **33**, 1870-1874 (2016).
